# Supplementary material
Source: PubMed Central journal article supplement (PMC5867220)
Supplement: NIHMS926616-supplement-supplement_1.pdf [file NIHMS926616-supplement-supplement_1.pdf]

Supplemental Table 1

*Effects of Cognitive Enhancement Therapy Versus Enriched Supportive Therapy on Individual Neurocognitive Measures.*

|                                      | CET             |                 |                 | EST             |                 |                 | Effect Size      |                  |
|--------------------------------------|-----------------|-----------------|-----------------|-----------------|-----------------|-----------------|------------------|------------------|
|                                      | Baseline        | Month 9         | Month 18        | Baseline        | Month 9         | Month 18        | $d_{\text{CET}}$ | $d_{\text{EST}}$ |
|                                      | $M$ (SD)        |                  |                  |
| Processing Speed                     | 47.78<br>(8.66) | 43.16<br>(8.80) | 58.45<br>(9.01) | 46.74<br>(7.98) | 40.23<br>(8.15) | 42.13<br>(8.32) | .32              | -.14             |
| Attention/<br>Vigilance              | 27.30<br>(7.81) | 40.79<br>(7.95) | 52.21<br>(8.21) | 35.70<br>(7.20) | 40.20<br>(7.36) | 41.06<br>(7.58) | .84              | .18              |
| Working Memory                       | 35.42<br>(6.83) | 38.88<br>(6.97) | 42.43<br>(7.18) | 27.33<br>(6.30) | 31.07<br>(6.46) | 37.96<br>(6.63) | .27              | .41              |
| Verbal Learning                      | 41.66<br>(7.29) | 32.39<br>(7.78) | 46.36<br>(8.86) | 36.97<br>(6.72) | 34.75<br>(7.24) | 36.59<br>(8.20) | .17              | -.01             |
| Visual Learning                      | 35.30<br>(6.78) | 41.90<br>(7.00) | 44.06<br>(7.20) | 40.53<br>(6.25) | 52.03<br>(6.54) | 43.19<br>(6.64) | .34              | .10              |
| Reasoning and<br>Problem-<br>Solving | 57.52<br>(7.65) | 50.15<br>(7.83) | 59.61<br>(7.98) | 47.27<br>(7.05) | 53.57<br>(7.29) | 54.65<br>(7.37) | .07              | .25              |
| WCST:<br>Categories<br>Completed     | 4.83<br>(.38)   | 5.63<br>(.39)   | 5.86<br>(.40)   | 4.93<br>(.35)   | 5.61<br>(.37)   | 5.47<br>(.38)   | .71              | .37              |
| WCST:<br>Perseverative<br>Errors     | 19.41<br>(3.04) | 13.25<br>(3.11) | 6.97<br>(3.17)  | 15.64<br>(2.80) | 9.24<br>(2.91)  | 7.21<br>(3.01)  | -1.08            | -.73             |

*Note.* Results are from linear mixed-effects models adjusting for education and racial status. CET = Cognitive Enhancement Therapy; EST = Enriched Supportive Therapy; WCST = Wisconsin Card Sorting Test

Supplemental Table 2

*Effects of Cognitive Enhancement Therapy Versus Enriched Supportive Therapy on Individual Social-Cognitive Measures.*

|                        | CET              |                  |                  | EST              |                  |                  | Effect Size      |                  |
|------------------------|------------------|------------------|------------------|------------------|------------------|------------------|------------------|------------------|
|                        | Baseline         | Month 9          | Month 18         | Baseline         | Month 9          | Month 18         | $d_{\text{CET}}$ | $d_{\text{EST}}$ |
|                        | $M$ (SD)         |                  |                  |
| Perceiving Emotions    | 107.67<br>(4.01) | 107.90<br>(4.15) | 102.73<br>(4.37) | 107.49<br>(3.70) | 108.28<br>(3.87) | 104.34<br>(4.04) | -.32             | -.21             |
| Facilitation Emotions  | 100.72<br>(3.76) | 104.97<br>(3.88) | 101.48<br>(4.00) | 97.51<br>(3.46)  | 96.82<br>(3.63)  | 97.59<br>(3.72)  | .05              | .01              |
| Understanding Emotions | 95.32<br>(3.10)  | 94.20<br>(3.17)  | 95.89<br>(3.23)  | 86.93<br>(2.86)  | 91.61<br>(2.95)  | 91.94<br>(2.99)  | .05              | .42              |
| Managing Emotions      | 89.85<br>(2.38)  | 96.29<br>(2.44)  | 94.17<br>(2.49)  | 92.65<br>(2.19)  | 93.11<br>(2.27)  | 94.04<br>(2.30)  | .48              | .15              |
| Emotion Recognition    | 31.85<br>(.88)   | 31.77<br>(.95)   | 33.15<br>(1.06)  | 30.89<br>(.81)   | 30.98<br>(.88)   | 31.96<br>(.98)   | .39              | .32              |
| Emotion Discrimination | 23.85<br>(1.55)  | 24.01<br>(1.64)  | 23.91<br>(1.75)  | 22.20<br>(1.43)  | 22.28<br>(1.53)  | 22.79<br>(1.62)  | .01              | .10              |
| Emotional Acuity       | 38.28<br>(.46)   | 38.59<br>(.48)   | 39.23<br>(.50)   | 38.61<br>(.42)   | 38.06<br>(.45)   | 39.03<br>(.46)   | .54              | .24              |
| Tolerant Behaviors     | 3.11<br>(.14)    | 3.63<br>(.15)    | 3.86<br>(.17)    | 3.01<br>(.13)    | 3.20<br>(.14)    | 3.41<br>(.16)    | 1.46             | .76              |
| Perceptive Behaviors   | 2.50<br>(.14)    | 3.15<br>(.15)    | 3.48<br>(.16)    | 2.31<br>(.13)    | 2.59<br>(.14)    | 2.95<br>(.15)    | 1.80             | 1.18             |
| Family Perceptions     | -14.51<br>(1.50) | -12.25<br>(1.49) | -11.74<br>(1.64) | -16.73<br>(1.29) | -18.58<br>(1.39) | -14.08<br>(1.40) | .54              | .52              |

*Note.* Results are from linear mixed-effects models adjusting for education and racial status.  
CET = Cognitive Enhancement Therapy; EST = Enriched Supportive Therapy
